# Supplementary material
Source: PubMed Central journal article supplement (PMC3225014)
Supplement: jp207104w_si_001.pdf [file jp207104w_si_001.pdf]

**Altering the Electrostatic Potential in the Major Groove:  
Thermodynamic and Structural Characterization of 7-Deaza-2'-deoxyadenosine•dT Base  
Pairing in DNA**

Ewa A. Kowal,<sup>1</sup> Manjori Ganguly,<sup>2</sup> Pradeep S. Pallan,<sup>3</sup> Luis A. Marky,<sup>4</sup> Barry Gold,<sup>2</sup> Martin Egli,<sup>3</sup> and Michael P. Stone.<sup>1,3\*</sup>

Supporting Information

<sup>1</sup>Department of Chemistry, Vanderbilt University, Nashville, TN 37235

<sup>2</sup>Department of Pharmaceutical Sciences, University of Pittsburgh, Pittsburgh, PA 15261

<sup>3</sup>Department of Biochemistry, Vanderbilt University, Nashville, TN 37232

<sup>4</sup>Department of Pharmaceutical Sciences, University of Nebraska Medical Center, Omaha, NE 68198

\*To whom correspondence should be addressed

Telephone 615-322-2589

FAX 615-322-7591

e-mail michael.p.stone@vanderbilt.edu

**Table S1.** Parameters used to calculate differential water binding for dodecamers.<sup>a</sup>

| Oligodeoxynucleotide | NaCl (mM) | $\Delta H_{\text{cal}}/RT_M^2$ (°C) | $\partial T_M/\partial \log a_w$<br>(°C) | $\Delta n_w$ (mol <sup>-1</sup> )<br>DNA |
|----------------------|-----------|-------------------------------------|------------------------------------------|------------------------------------------|
| DDD                  | 10        | 0.62                                | 7.49                                     | $-53.0 \pm 5.0$                          |
|                      | 100       | 0.50                                |                                          |                                          |
|                      | 100 (EG)  | 0.40                                |                                          |                                          |
| 7-deaza-dA DDD       | 10        | 0.40                                | 7.41                                     | $-26.0 \pm 4.0$                          |
|                      | 100       | 0.32                                |                                          |                                          |
|                      | 100 (EG)  | 0.28                                |                                          |                                          |

<sup>a</sup>The slopes of  $T_M$  vs  $\log a_w$  were obtained by least-square analysis. The values of  $\Delta H/RT_M^2$  represent an average of three determinations in each salt concentration while  $\partial T_M/\log a_w$  was determined at 100mM sodium phosphate buffer (pH 7.0)

EG : 1.4 m ethylene glycol

**Table S2.** Parameters Used to Calculate Differential Counterion Binding for Dodecamers.<sup>a</sup>

| Oligodeoxynucleotide | NaCl (mM) | $\Delta H_{\text{cal}}/RT_M^2$ (°C) | $\partial T_M/\partial \log[\text{Na}^+]$<br>(°C) | $\Delta n_{\text{Na}^+}$ (mol <sup>-1</sup> )<br>DNA |
|----------------------|-----------|-------------------------------------|---------------------------------------------------|------------------------------------------------------|
| DDD                  | 10        | 0.62                                | 7.49                                              | -2.3 ± 0.15                                          |
|                      | 100       | 0.50                                |                                                   | -1.8 ± 0.12                                          |
| 7-deaza-dA DDD-1     | 10        | 0.40                                | 7.41                                              | -1.4 ± 0.14                                          |
|                      | 100       | 0.32                                |                                                   | -1.1 ± 0.12                                          |

<sup>a</sup>Data obtained in 10 mM sodium phosphate at pH 7.0 adjusted to the desired ionic strength with NaCl.

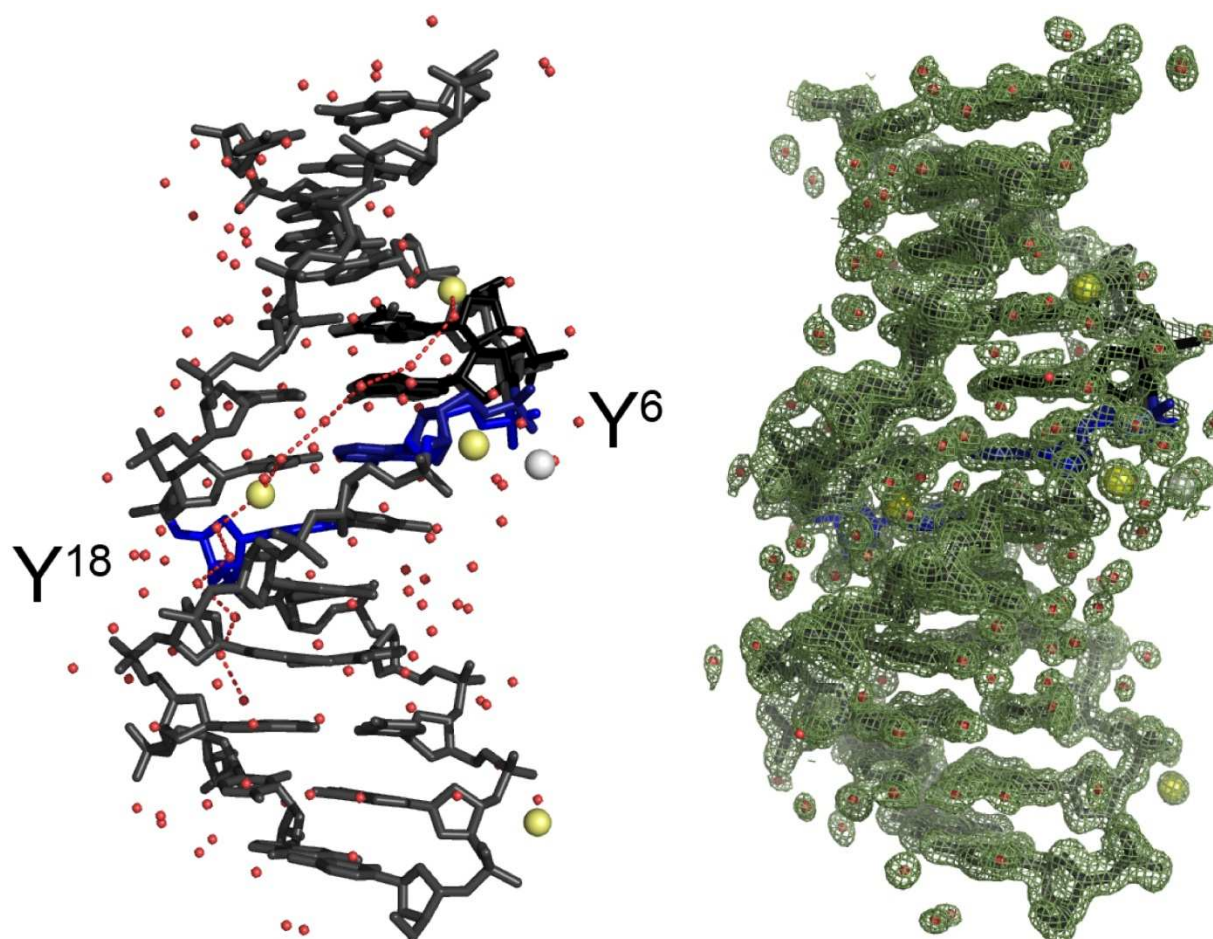

**Figure S1.** Stick model of the crystal structure of 7-deaza-dA modified DDD-1 (left side) and electron density shown at  $1.0 \sigma$  level around the duplex (right side). Modified bases  $Y^6$  and  $Y^{18}$  are shown in blue,  $Mg^{2+}$  ion is shown as white sphere, 133 water molecules are shown as red spheres and four  $Na^+$  ions as yellow spheres. Red dash line shows water inner spine in the minor groove of DNA duplex. It contains water and sodium molecules (from the bottom end): HOH 426, HOH 444, HOH 438, HOH 442, HOH 412, HOH 441, NA 400, HOH 450, HOH 413, HOH 451, HOH 432, HOH 519, NA 402.

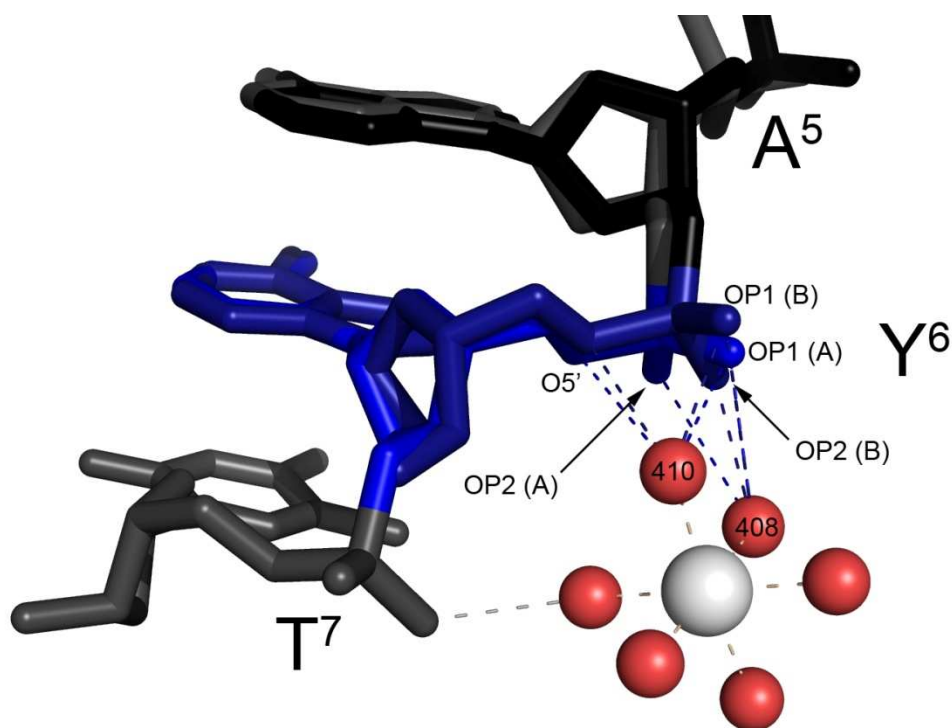

**Figure S2.** Interactions between Mg<sup>2+</sup> ion and DDD-1 duplex are indicated by dash lines.

Modified base Y<sup>6</sup> is in blue (one phosphate conformation, A) and navy (second phosphate group conformation, B). Mg<sup>2+</sup> ion (white sphere) is coordinated by six water molecules (red spheres).

The Mg<sup>2+</sup> ion interacts via coordinated waters with phosphate oxygens of two conformers of Y<sup>6</sup> and T<sup>7</sup> nucleotides. Distances between water molecules coordinated to Mg<sup>2+</sup> ion and Y<sup>6</sup>

nucleotide are shown below:

|         |         |        |
|---------|---------|--------|
| HOH 410 | OP1 (A) | 3.55 Å |
| HOH 410 | OP1 (B) | 2.73 Å |
| HOH 410 | O5' (A) | 4.06 Å |
| HOH 410 | O5' (B) | 3.44 Å |
| HOH 408 | OP1 (A) | 2.85 Å |
| HOH 408 | OP1 (B) | 3.53 Å |
| HOH 408 | OP2 (A) | 4.04 Å |

HOH 408    OP2 (B)    2.77 Å

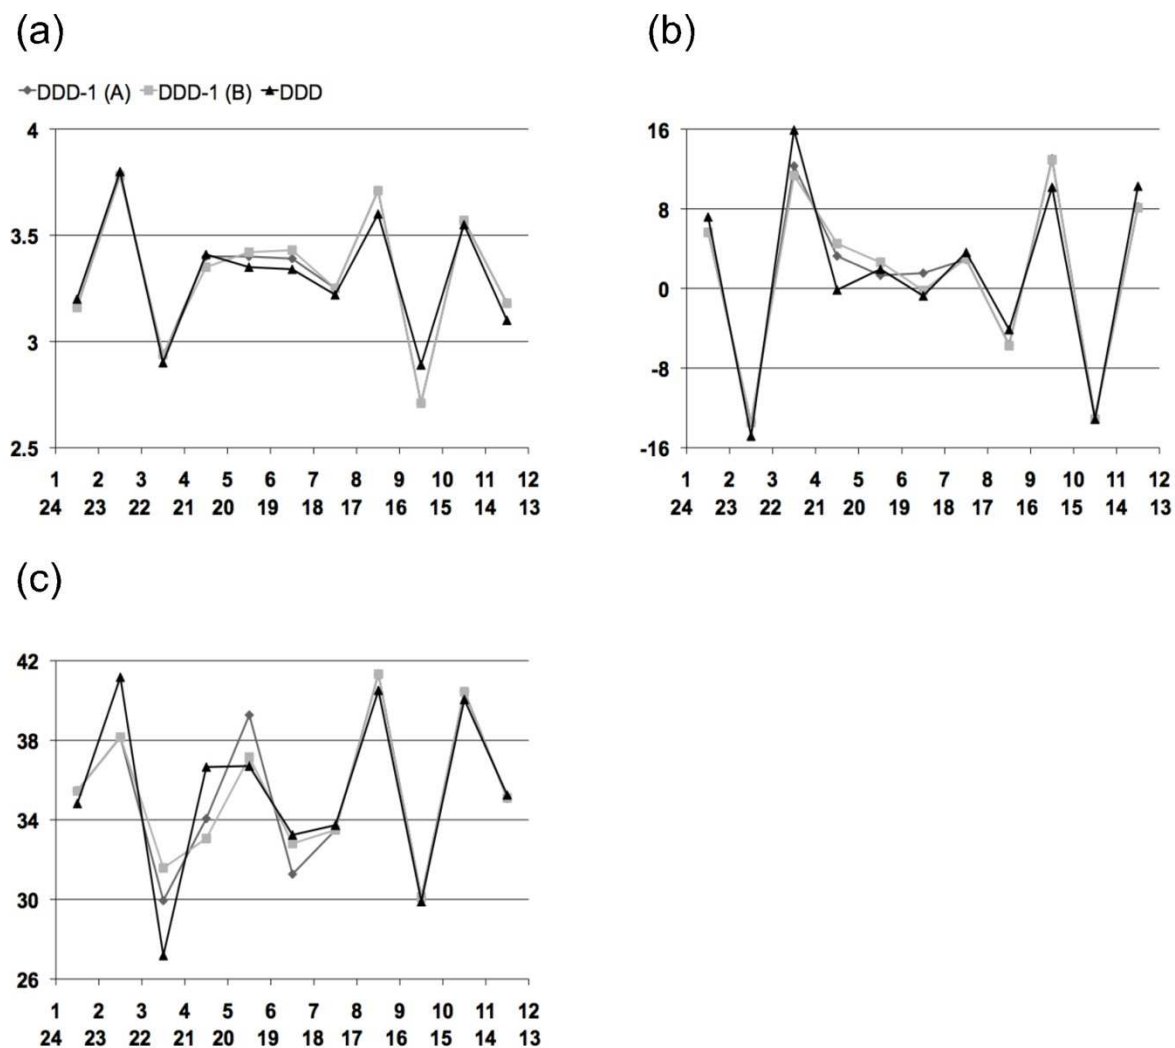

**Figure S3.** Interbase pair parameters: (a) helical rise, (b) roll and (c) twist for the DDD-1(A) (with one phosphate backbone conformation for the G<sup>4</sup>, A<sup>5</sup> and Y<sup>6</sup>), DDD-1 (B) (with second phosphate conformation for the G<sup>4</sup>, A<sup>5</sup> and Y<sup>6</sup>), DDD (PDB entry 355D) duplexes.

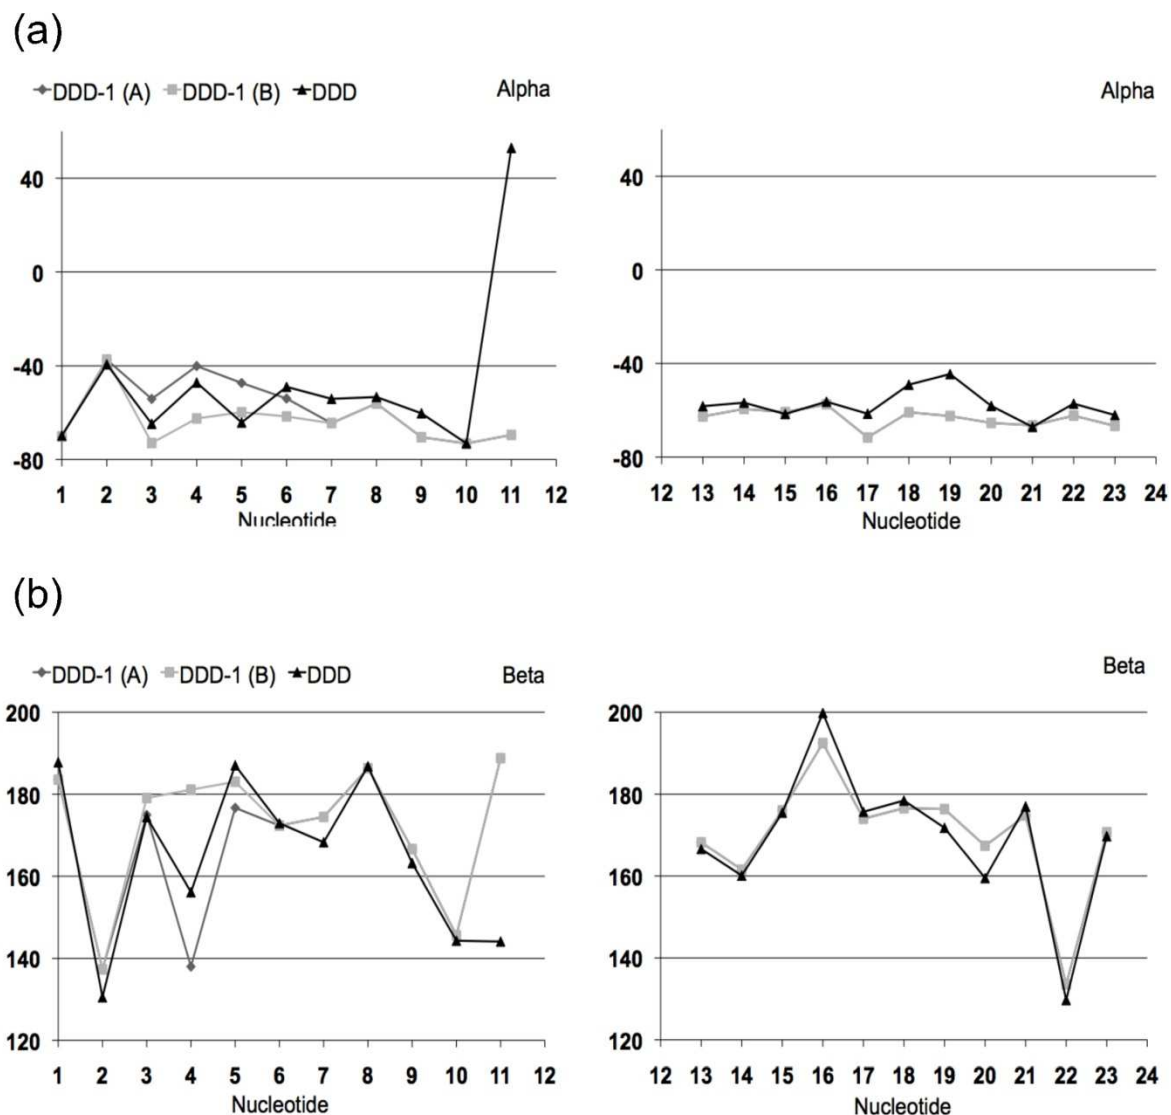

**Figure S4.** Comparison of backbone torsion angles (a) Alpha and (b) Beta in the crystal structures of the DDD-1(A) (with one phosphate backbone conformation for the G<sup>4</sup>, A<sup>5</sup> and Y<sup>6</sup>), DDD-1 (B) (with second phosphate conformation for the G<sup>4</sup>, A<sup>5</sup> and Y<sup>6</sup>), DDD (PDB entry 355D) duplexes.



(a)

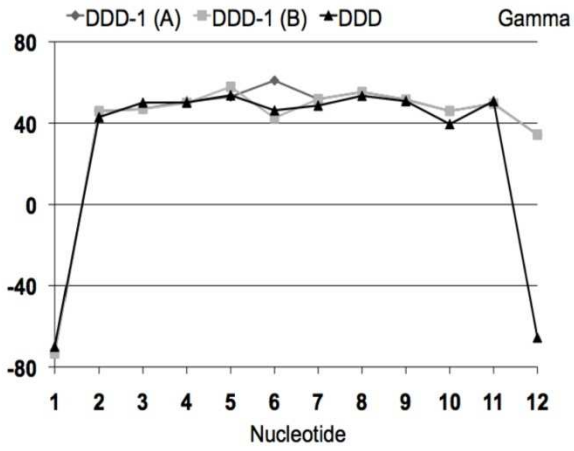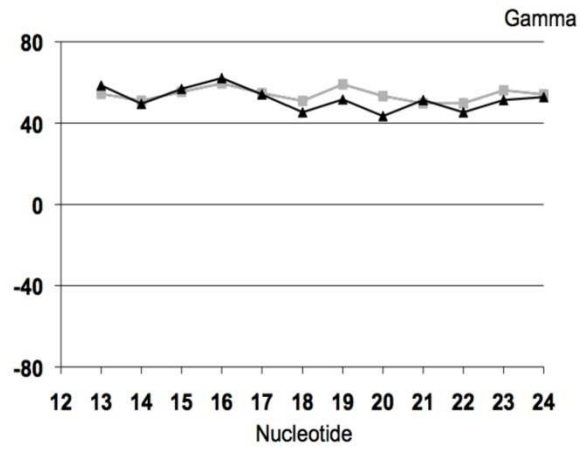

(b)

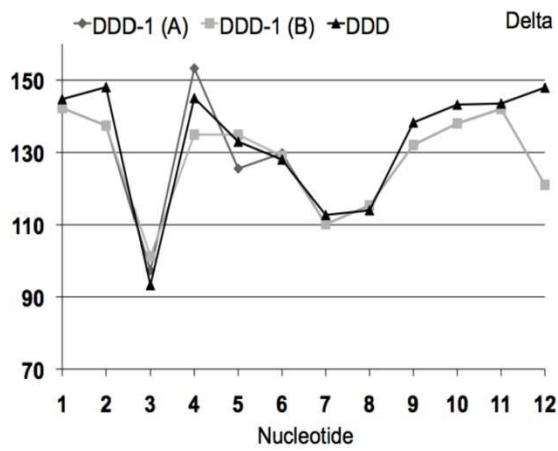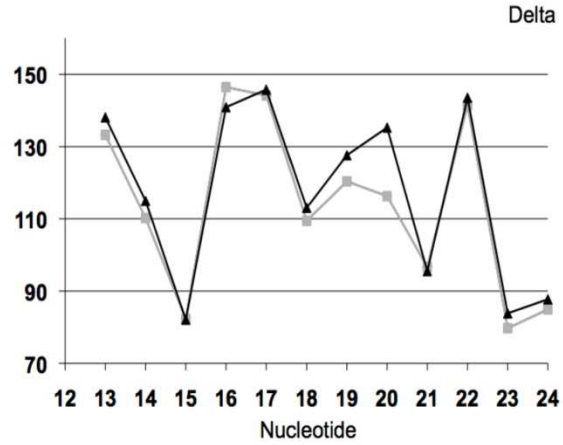

(c)

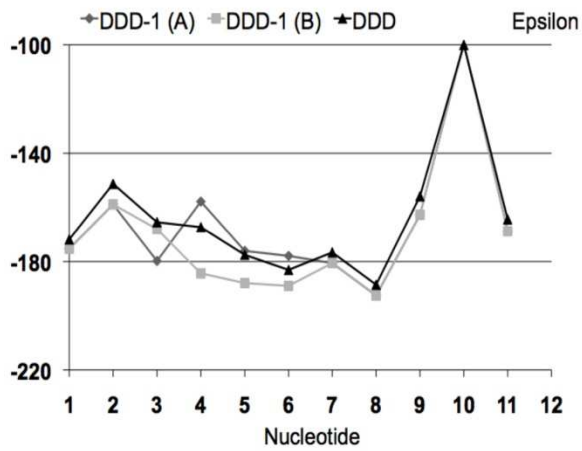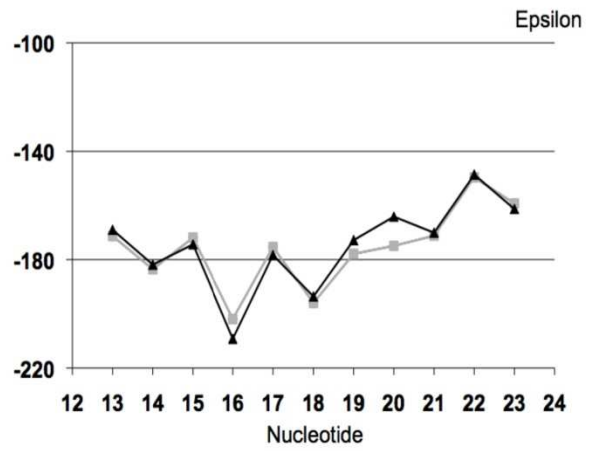

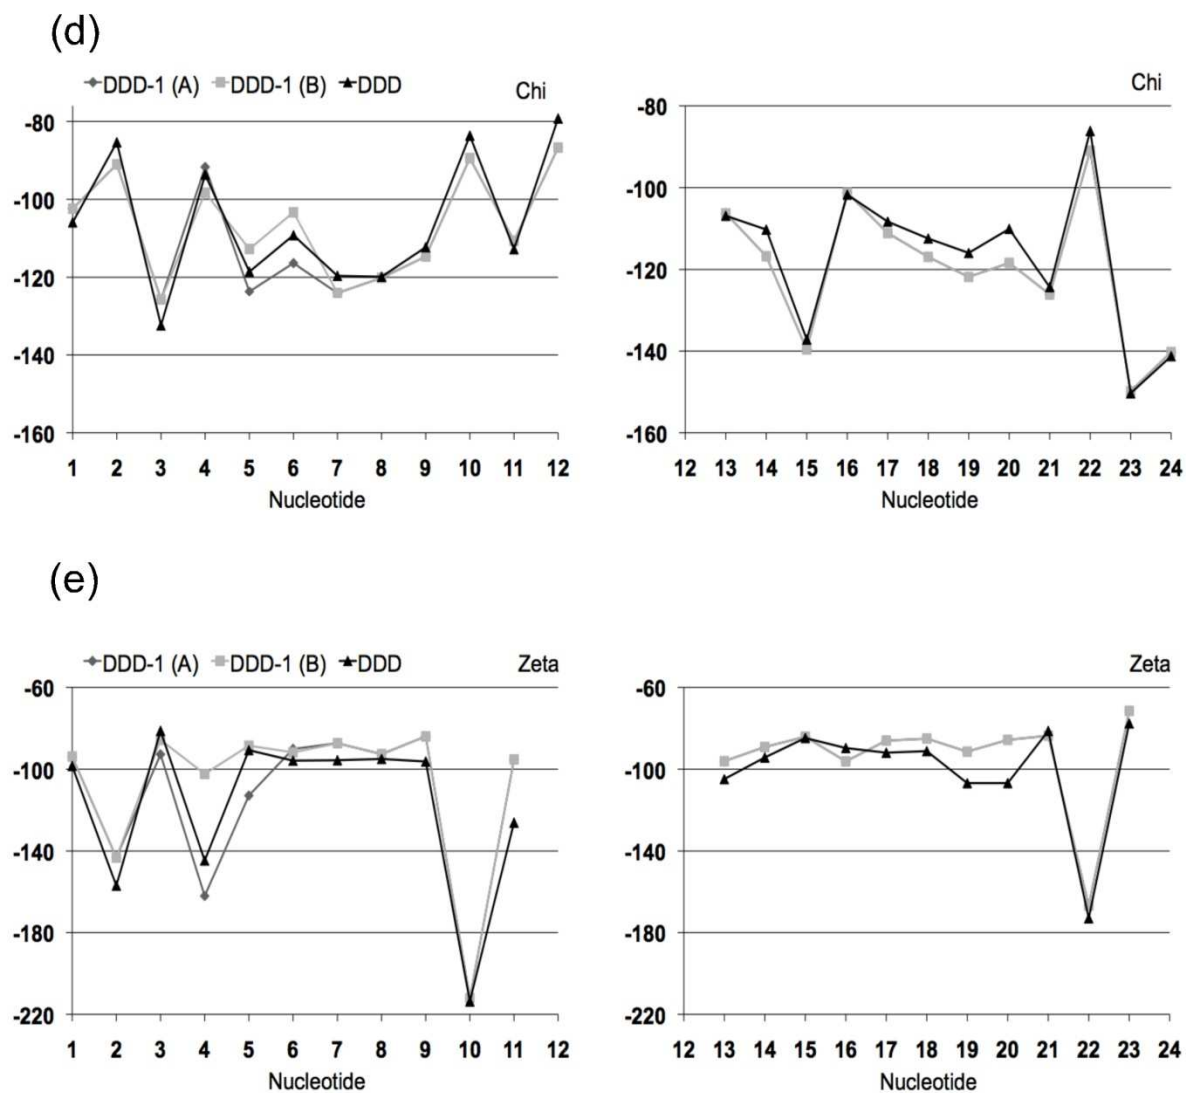

**Figure S5.** Comparison of (a) Gamma, (b) Delta, (c) Epsilon, (d) Chi and (e) Zeta angles in the crystal structures of the DDD-1(A) (with one phosphate backbone conformation for the G<sup>4</sup>, A<sup>5</sup> and Y<sup>6</sup>), DDD-1 (B) (with second phosphate conformation for the G<sup>4</sup>, A<sup>5</sup> and Y<sup>6</sup>), DDD (PDB entry 355D) duplexes.

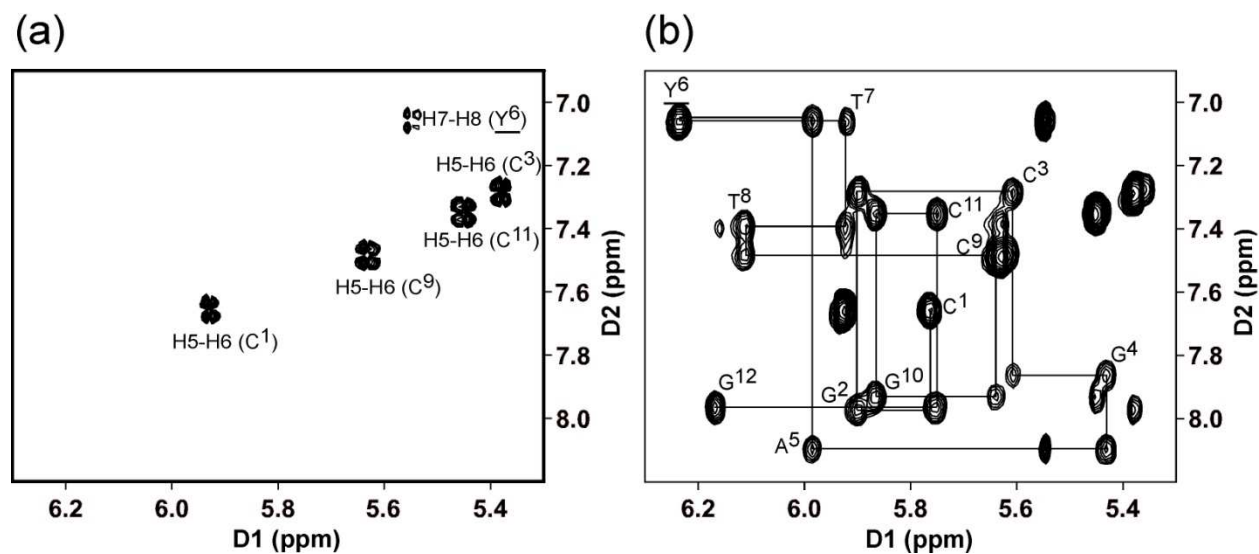

**Figure S6.** The 7-deaza-dA modified DDD-1 duplex. (a) The expanded plot of a DQF-COSY spectrum of DDD-1 duplex shows four cross peaks corresponding to four cytosine H5-H6 proton interactions (C<sup>1</sup>, C<sup>3</sup>, C<sup>9</sup>, C<sup>11</sup>) and one cross peak corresponding to the H7-H8 proton interactions of the 7-deaza-dA (b) The expanded plot of the NOESY spectrum of the DDD-1 duplex showing sequential NOEs between the aromatic and anomeric protons.
